# Supplementary material
Source: Springer Nature journal article supplement (https://www.springermedizin.de/resource/supplementary/12889_2013_5585_MOESM1_ESM.pdf/9495758)

12 weeks

31% participation

56% participation

81% participation

Proportion of the Population Requiring TX (%)

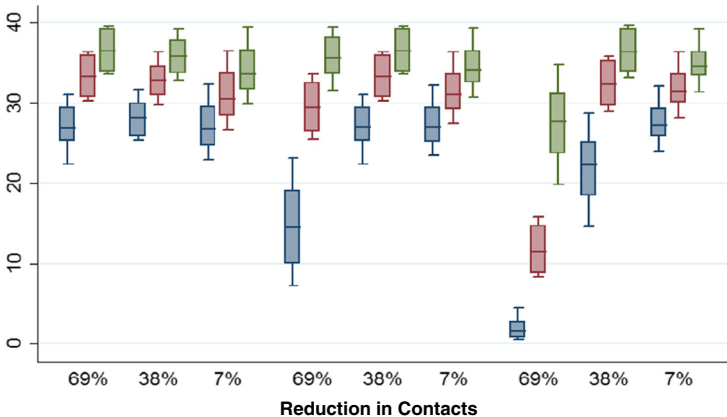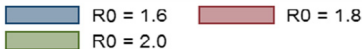

Supplement: MOESM1 [file 9495758]
